# Supplementary material for: Crystallographic identification of an unusual homoleptic palladium citrate [Na(OH2)6]·{[Na3(OH2)8]3[NaPd3(C6H4O7)3]2}·(H2O) stabilised by intermetallic aggregation with sodium and heavy hydration
Source: Royal Society of Chemistry journal article supplement (doi:10.1039/c0dt00273a), 2010-01-01
Supplement: c0dt00273a.pdf [file c0dt00273a.pdf]

## Electronic Supplementary Information

### Crystallographic Identification of an Unusual Homoleptic Palladium Citrate [Na(OH<sub>2</sub>)<sub>6</sub>]{[Na<sub>3</sub>(OH<sub>2</sub>)<sub>8</sub>]<sub>3</sub>[NaPd<sub>3</sub>(C<sub>6</sub>H<sub>4</sub>O<sub>7</sub>)<sub>3</sub>]<sub>2</sub>}(H<sub>2</sub>O) Stabilised by Intermetallic Aggregation with Sodium and Heavy Hydration

Parag Gunari,<sup>a</sup> Suresh s/o Krishnasamy,<sup>a</sup> Shi-Qiang Bai<sup>a</sup> and T. S. Andy Hor<sup>\*a,b</sup>

<sup>a</sup> Department of Chemistry, National University of Singapore, 3 Science Drive 3, Singapore 117543. Fax: (+)65-6873-1324. E-mail: andyhor@nus.edu.sg

<sup>b</sup> Institute of Materials Research and Engineering, Agency for Science, Technology and Research, 3 Research Link, Singapore 117602

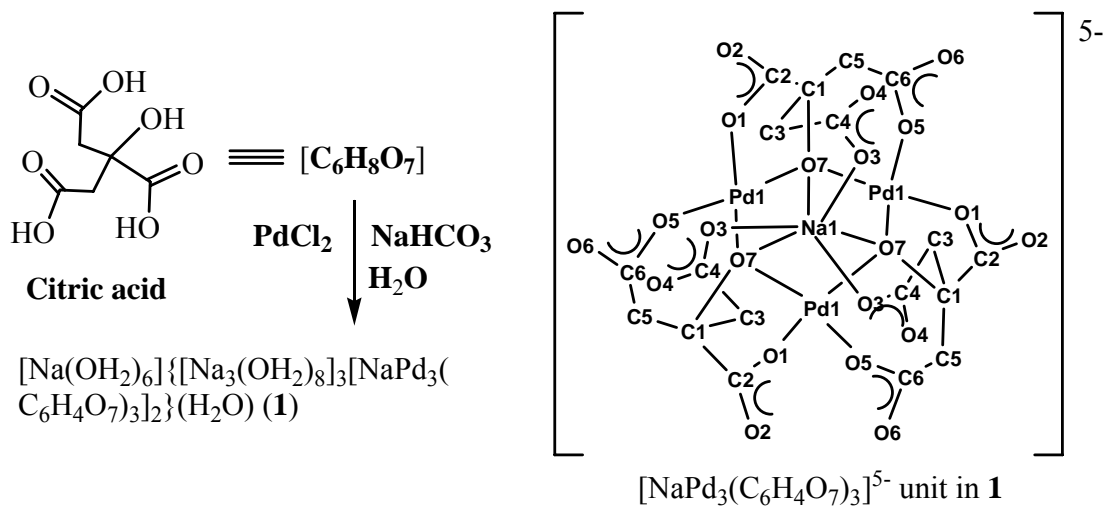

**Scheme S1.** One-pot formation of intermetallic supramolecular network of **1** from  $PdCl_2$  with citrate in aqueous solution (left) and the  $C_3$ -symmetric  $[NaPd_3(C_6H_4O_7)_3]^{5-}$  anion unit in **1** (right).

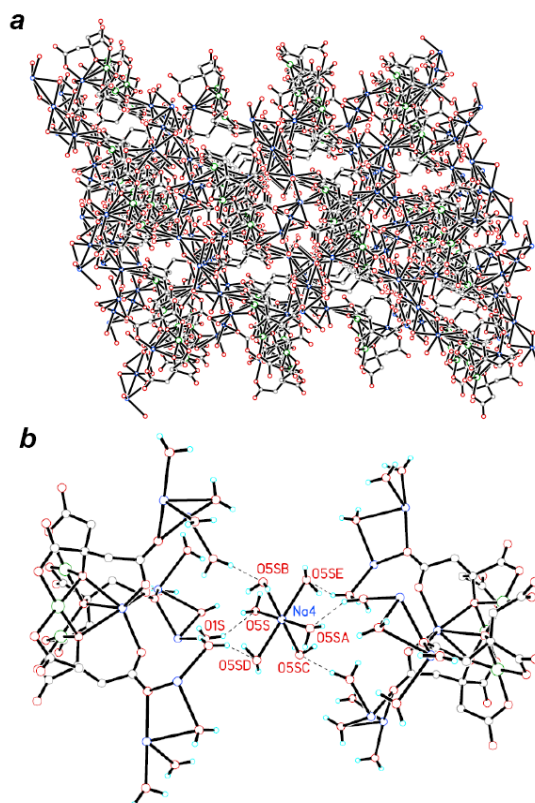

**Figure S1.** a) 3-D structure of **1**. b)  $[\text{Na}(\text{OH}_2)_6]^+$  complex was stabilised among two  $C_3$ -symmetry cavities by H-bond interactions in the network of **1**.

### Experimental section

$\text{NaHCO}_3$  (0.5101 g, 6 mmol) was added to an aqueous solution of citric acid (0.39 g, 2 mmol) and the mixture was stirred for 10 min to give a colorless solution, into which  $\text{PdCl}_2$  (0.1774g, 1 mmol) was added. The mixture was briefly swirled and then left standing overnight. It gradually turned to a clear orange solution. Ethanol was added to precipitate a yellow solid which was collected and redissolved in water and layered with ethanol to give orange crystals of **1**, yield 1.3 g (near-quantitative based on Pd).  $^1\text{H}$  NMR (300 MHz,  $\text{D}_2\text{O}$ ):  $\delta$  = 3.3159, 3.2638, 2.5965, 2.5461, 2.4749, 2.4639, 2.4240, 2.4119, (m, 2H,  $J$  = 15.6 Hz,  $\text{CH}_2$ ) 2.5965, 2.5461, 2.4749, and 2.4240, (m, 2H,  $J$  = 15.1 Hz,  $\text{CH}_2$ ), 2.7 and 3.2 (d, 2H,  $\text{H}_2\text{O}$ )  $^{13}\text{C}$  NMR: (75 MHz,  $\text{D}_2\text{O}$ ):  $\delta$  = 45.4, 48.6, 49.4, 50.6, 57.4 for  $\text{CH}_2$ , 75.1, 83.7, 84.7, 85.3 for CO, 176.8, 179, 179.9, 180.3, 181.7, 185.5 for

CO<sub>2</sub>. Anal. Calcd. for dried sample (PdNa<sub>2</sub>C<sub>6</sub>H<sub>43/3</sub>O<sub>73/6</sub> – H<sub>2</sub>O, lose one H<sub>2</sub>O per asymmetric unit): C, 17.34; H, 2.99 %. Found: C, 17.31; H, 2.46 %.

### **X-ray crystallography**

The measurement for **1** was conducted at r.t. on a Bruker AXS SMART APEX diffractometer, equipped with a CCD area-detector using Mo-K<sub>α</sub> radiation ( $\lambda = 0.71073 \text{ \AA}$ ). The collecting frames of date, indexing reflection and determination of lattice parameters and polarization effects were performed with the SMART suite programs.<sup>1</sup> The integration of intensity of reflections and scaling was carried out by SAINT.<sup>1</sup> The empirical absorption correction was performed by SADABS.<sup>2</sup> The space group determination, structure solution and least-squares refinements on  $|F|^2$  were carried out with the SHELXS-97 and SHELXL-97.<sup>3</sup> The structures were solved by direct methods to locate the heavy atoms, followed by difference maps for the light non-hydrogen atoms. O6S is situated at three fold axis, and the H atoms of O6S appeared to be disordered and were not located. H atoms were located from difference map, refined with thermal parameters following those of the atoms they were attached. OH distances were restrained. Pd is coordinated to four O's at about 2 Å and near to other Pd and Na at about 3.2–3.4 Å. O3 of the citrate is disordered (76 : 24 occupancy ratio).

### **References:**

1. *SMART* (Version 5.631) & *SAINTE* (Version 6.63) *Software Reference Manuals*, Bruker AXS GmbH, Karlsruhe, Germany, **2000**.
2. G. M. Sheldrick, *SADABS: a Software for Empirical Absorption Correction*, University of Göttingen, Göttingen, Germany, **2001**.
3. (a) G. M. Sheldrick, *SHELXS-97, Program for Crystal Structure Solution*, University of Göttingen, Göttingen, Germany, **1997**; (b) G. M. Sheldrick, *SHELXL-97, Program for Crystal Structures Refinement*, University of Göttingen, Göttingen, Germany, **1997**.
